# Supplementary material for: IL17F Expression as an Early Sign of Oxidative Stress-Induced Cytotoxicity/Apoptosis
Source: MDPI journal article supplement (doi:10.3390/genes13101739), 2022-09-27
Supplement: s1 [file s1]

# Controls

*Isotype control*

*24 h culture control*

Hoechst 33342

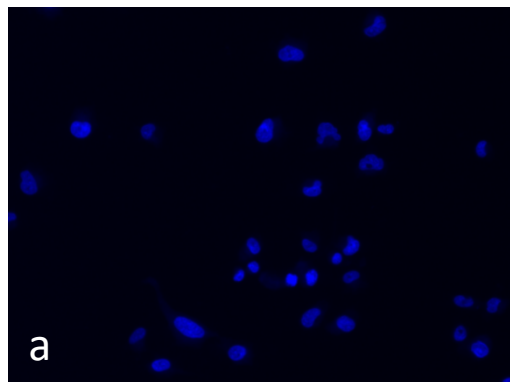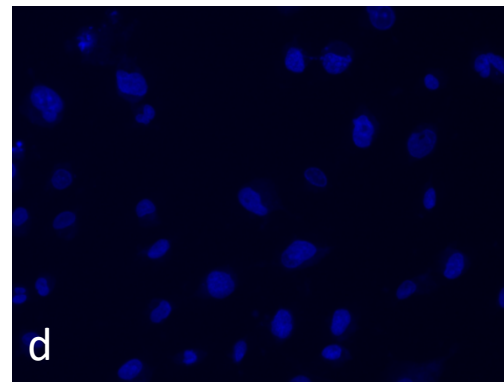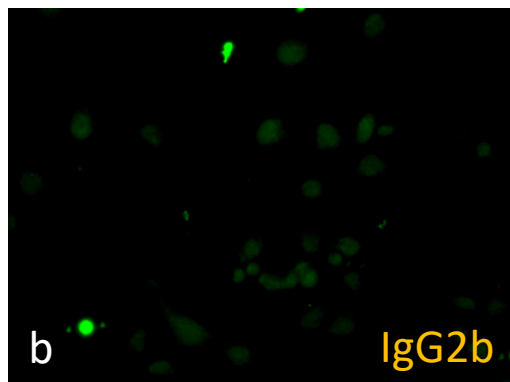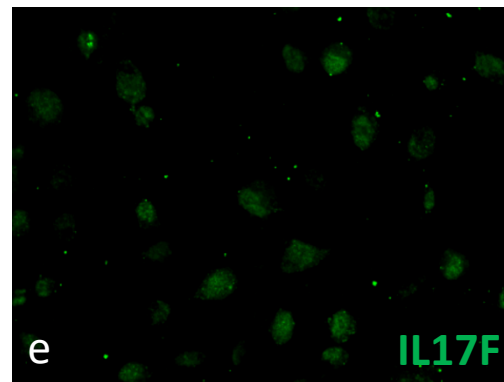

Overlay

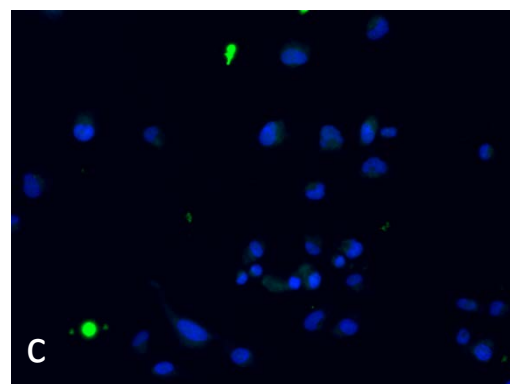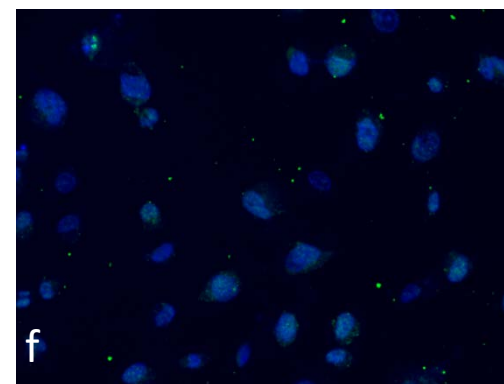

## IL1B

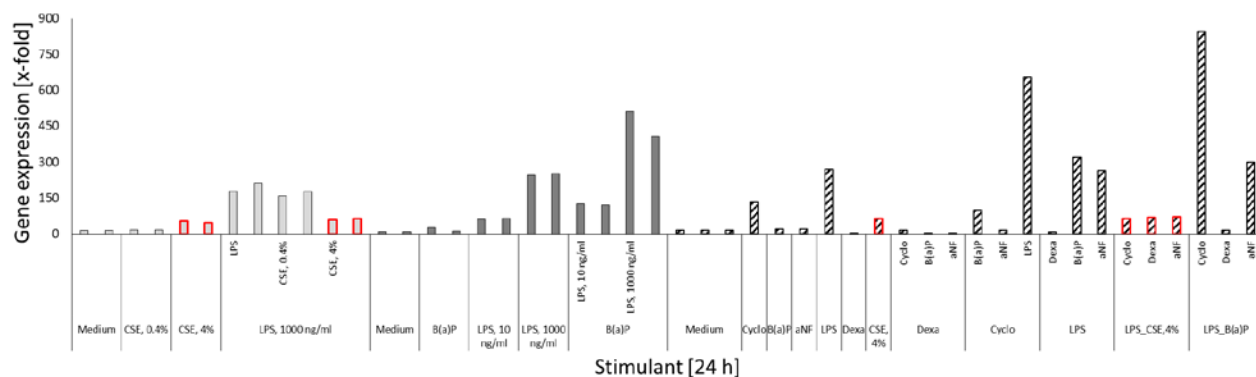

## TNFA

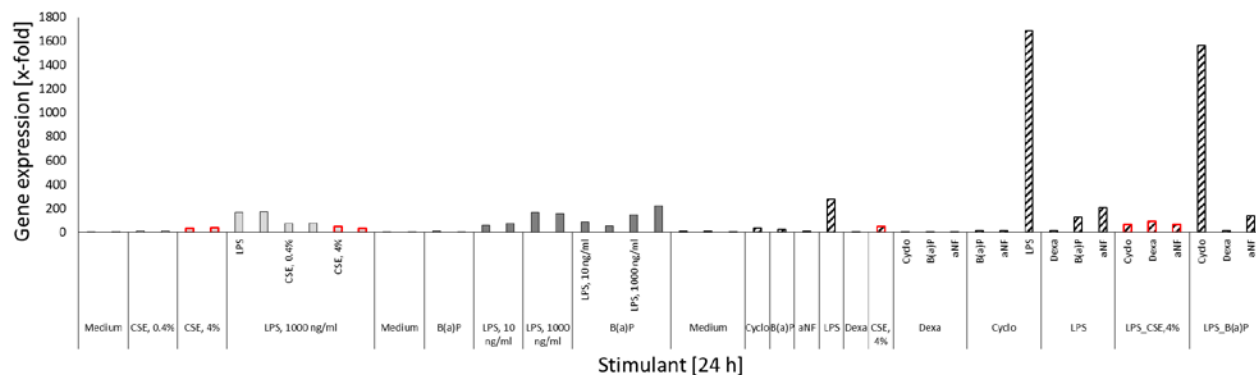

## IL17A

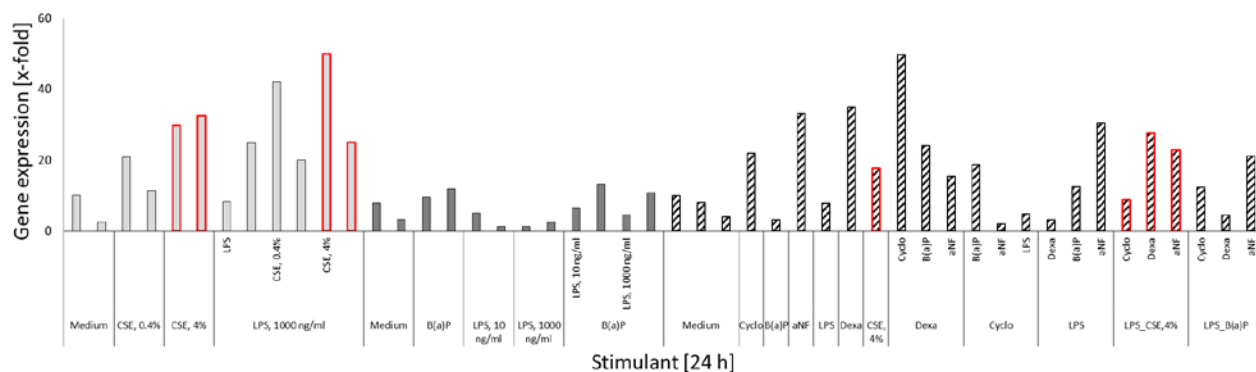

## IL17F

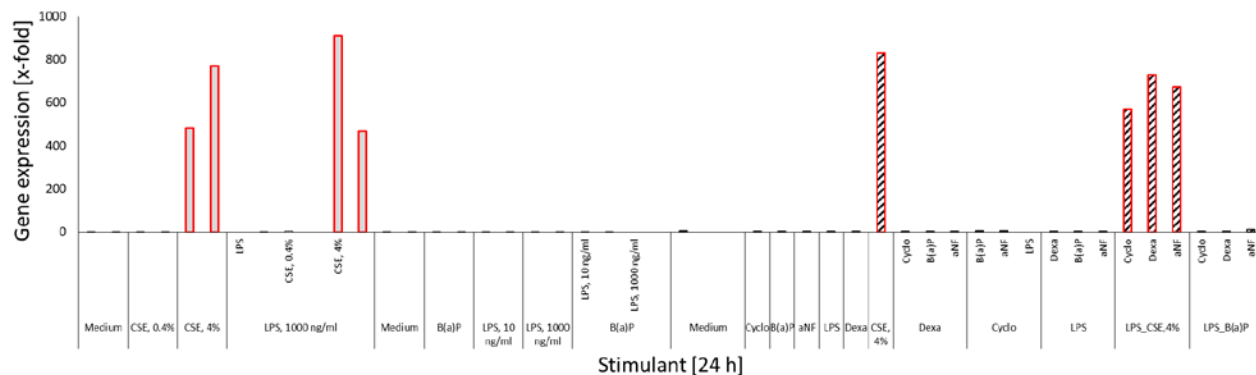

Stimulants of 3 independent exposure experiments (□, ■, ▨):  
 Cyclo, cycloheximide (*translation inhibitor*)  
 Dexa, dexamethasone (*immunosuppressive glucocorticoid*)  
 aNF, alpha-naphthoflavone (*AhR-antagonist*)  
 B(a)P, benz(a)pyrene (*AhR-agonist*)  
 LPS, lipopolysaccharide (*TLR4-agonist*)  
 CSE, aqueous cigarette smoking extract

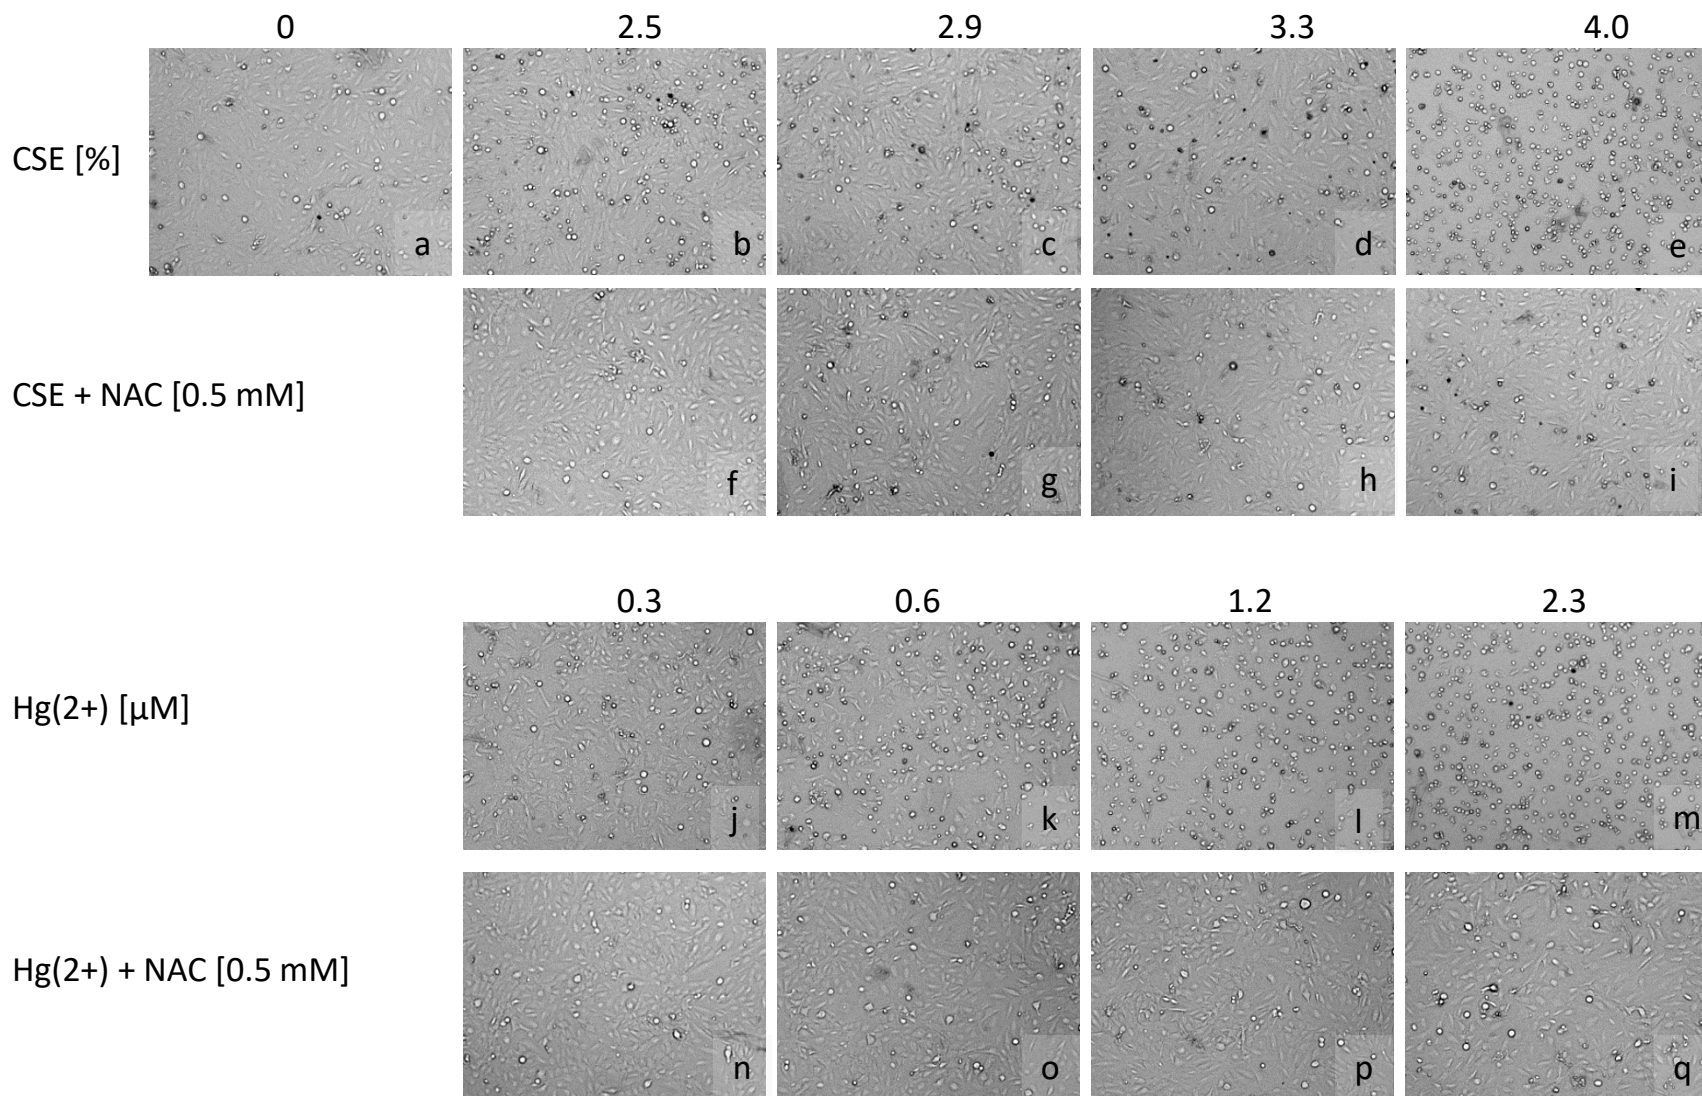

**Supplementary Figure S3**

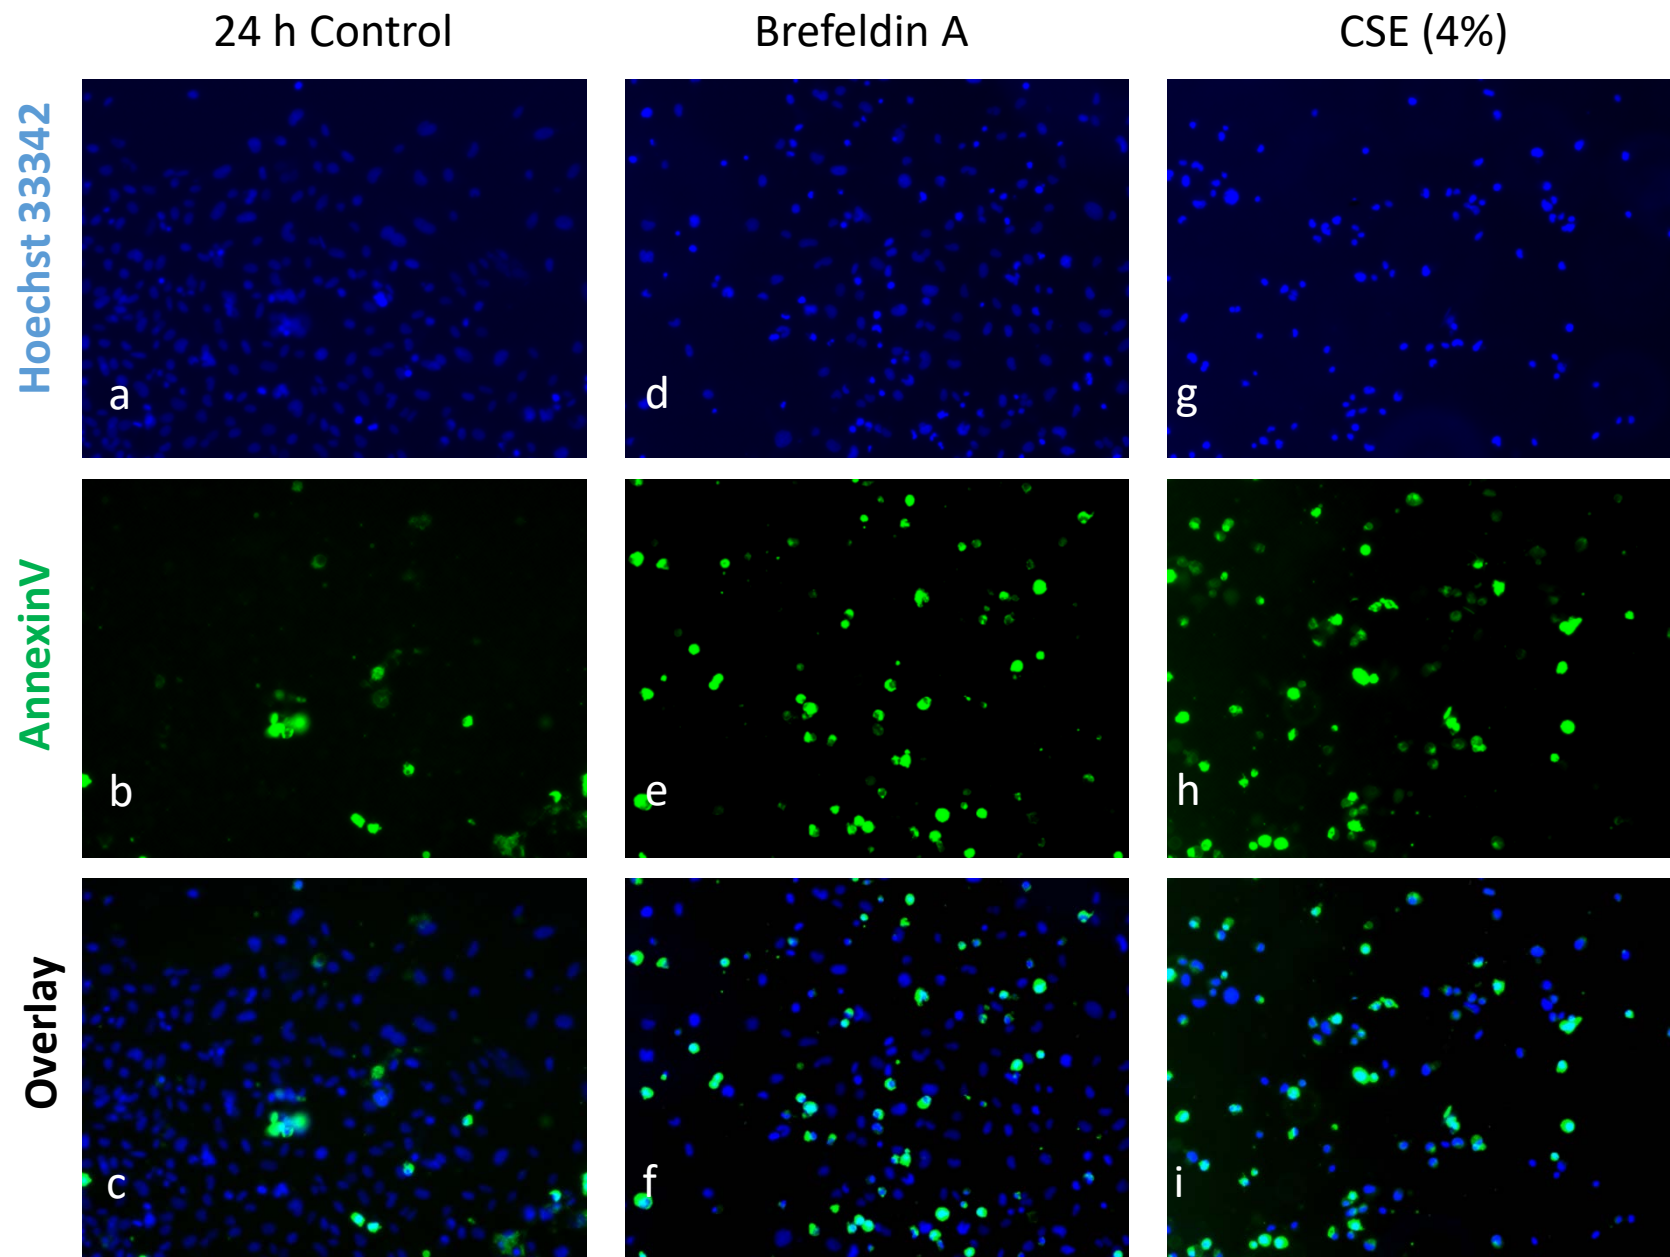

Supplementary Figure S4

A

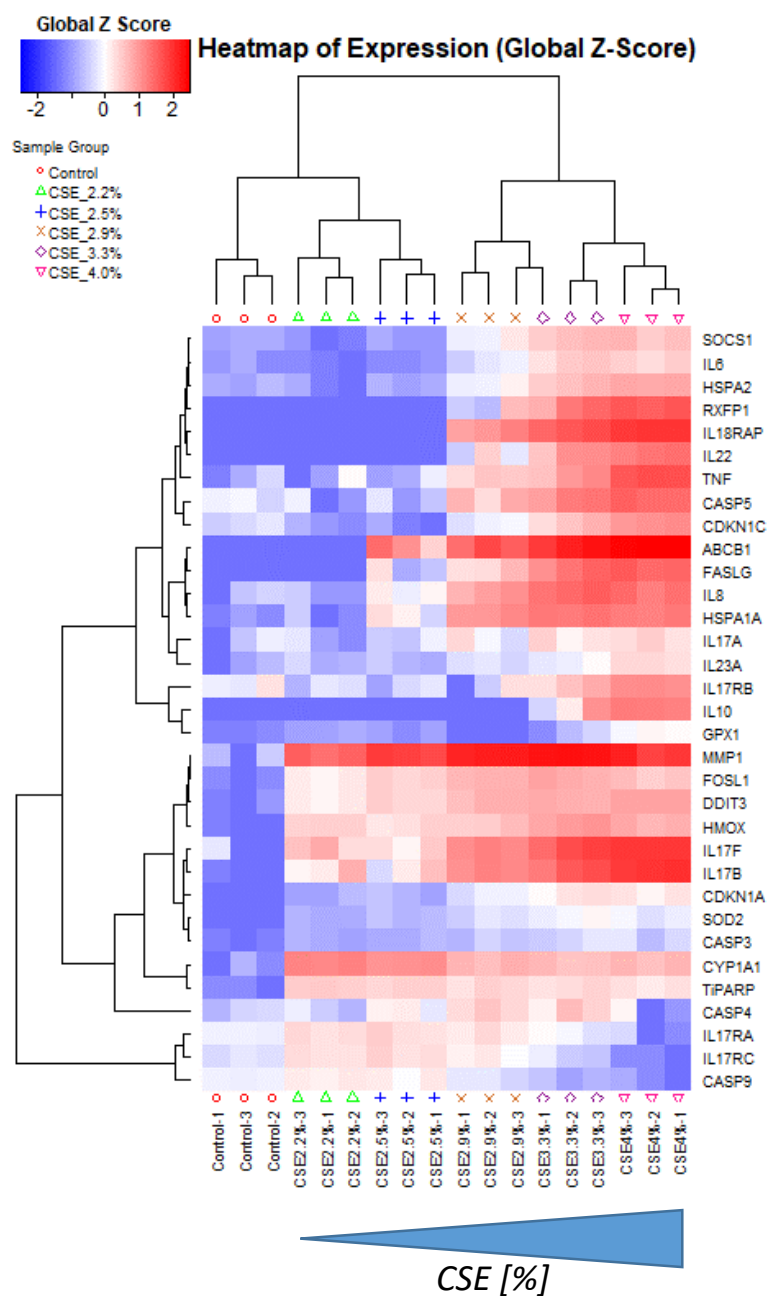

B

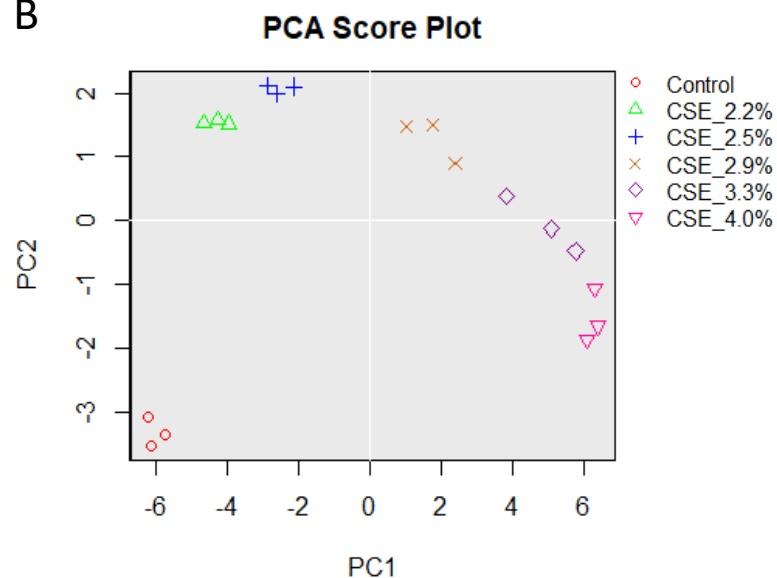

Supplementary Figure S5

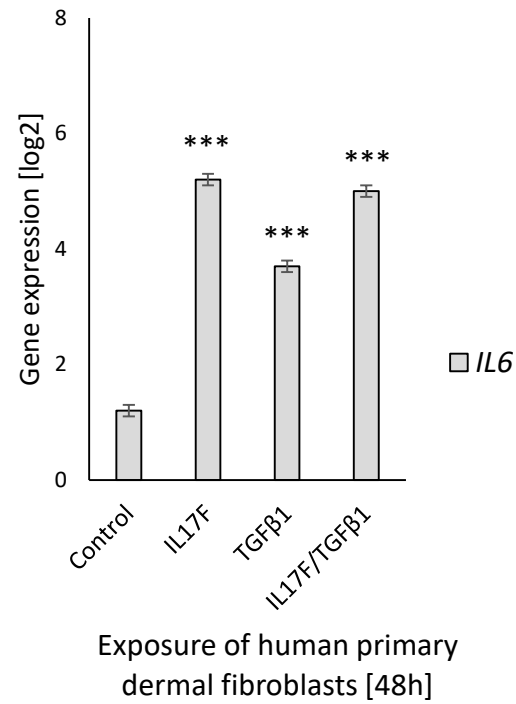



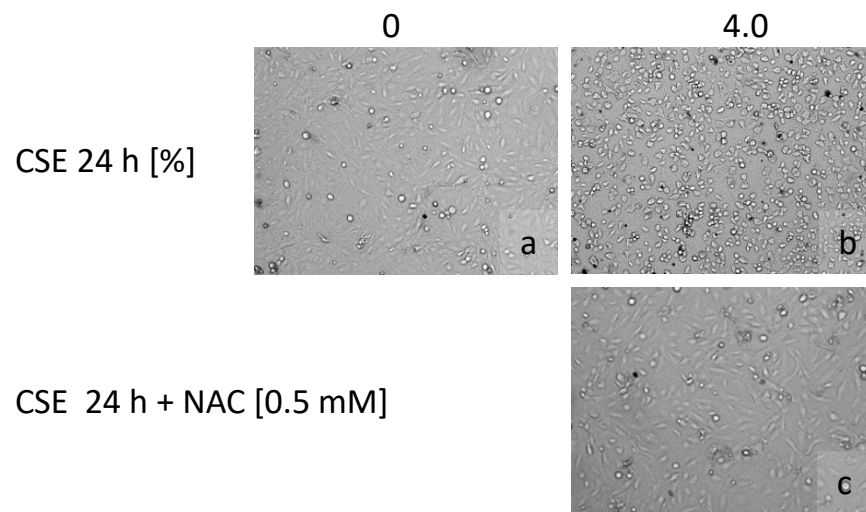

**Supplementary Table S1: Primer sequences and universal probe library probes (UPL)**  
used for qPCR

| Gene           | Primer_forward           | Primer_reverse           | UPL | Remarks                     |
|----------------|--------------------------|--------------------------|-----|-----------------------------|
| <i>ABCB1</i>   | ccggtggggcaagtcarttcatt  | ccggtcggggtgggtagttga    | 66  |                             |
| <i>ACTA2</i>   | gctgttttcccatccattgt     | agggtgggatgctcttcag      | w/o | fibrosis                    |
| <i>CASP3</i>   | ctggttttcggtgggtgt       | ccactgagtttcagtgttctcc   | 34  |                             |
| <i>CASP4</i>   | ttcctggcaattgaaaatgg     | tgcaagctgtactaatgaagggtg | 23  |                             |
| <i>CASP5</i>   | cctcttctctggcaattgaa     | tgctctttgatgttgacagagg   | 27  |                             |
| <i>CASP9</i>   | cccaagctcttttcatcca      | ttactgccaggggactcgt      | 32  |                             |
| <i>CDKN1A</i>  | ccgaggcactcagaggag       | agctgctcgctgtccact       | 70  |                             |
| <i>CDKN1C</i>  | ctcctttcccccttctctcg     | tccatcggtgatgtgctg       | 55  |                             |
| <i>COL1A1</i>  | gtcgcactgggtgatgctg      | gggtgtgtccacctcgag       | w/o | fibrosis                    |
| <i>CYP1A1</i>  | tccaagagtccaccttcc       | aagcatgatcagtgtaggatct   | 66  |                             |
| <i>DDIT3</i>   | aaggcactgagcgtatcatgt    | tgaagatacacttcttctgaacac | 87  |                             |
| <i>FASLG</i>   | tggggatgttcagctcttc      | gtgtgcatctggctggtaga     | 17  |                             |
| <i>FN1</i>     | ccagtcacagctattcctg      | acaaccacggatgagctg       | w/o | isoform: ED-A FN1; fibrosis |
| <i>FOSL1</i>   | aaccggagggaaggaactgac    | ctgcagcccagatttctca      | 4   |                             |
| <i>GAPD</i>    | gctctctgctcctctgttc      | acgaccaaaccggtgactc      | 60  | reference gene              |
| <i>GAPD</i>    | gagtcaaccgatttggtcgt     | ttgattttggagggatctcg     | w/o | reference gene              |
| <i>GPX1</i>    | caaccagtttgggcatcag      | gtcacctcgcaacttctcg      | 77  |                             |
| <i>GUSB</i>    | cgccctgcctatctgtattc     | tccccacagggagtggtgtag    | 57  | reference gene              |
| <i>HMOX</i>    | cagtcaggcagagggtgatag    | cctgcaactcctcaaagagc     | 15  |                             |
| <i>HSPA1A</i>  | ggagtccttacgccttcaaca    | ccagcaccttcttctgtcg      | 88  |                             |
| <i>HSPA2</i>   | cgaggttaccttcgacattga    | tgttttccttacgggtgctc     | 70  |                             |
| <i>IL10</i>    | gatgccttcagcagagtga      | gcaaccacaggaacccttaa     | 67  |                             |
| <i>IL17A</i>   | ccccaaagcagtttagactatgg  | ttgaaggatgaggggtctcg     | 23  |                             |
| <i>IL17B</i>   | gtggatgtccaacaagaggag    | ctggggtcgtgggtgatg       | 45  |                             |
| <i>IL17C</i>   | ccctcagctacgaccagt       | cttctgtgatagcggctct      | 16  |                             |
| <i>IL17D</i>   | gccctgggcctacagaat       | acgacgggtgggcatgtag      | 27  |                             |
| <i>IL17E</i>   | catgtaccagggtcagtgaga    | tctgtcctctccctctcag      | 27  |                             |
| <i>IL17F</i>   | ggcatcatcaatgaaaacca     | tgggggtcccaagtgacag      | 10  |                             |
| <i>IL17RA</i>  | gtcatctgtcctcgtctg       | tgggtcatcactgtatttttact  | 85  |                             |
| <i>IL17RB</i>  | gtcgtcgtgctgctaa         | actctggagatggcccagt      | 21  |                             |
| <i>IL17RC</i>  | cgaagcttggaacagcatcc     | cagatgcacgtgtgcacat      | 3   |                             |
| <i>IL18RAP</i> | cagatattctggatcctgtcgag  | tgctttgcagctaatagttaaagg | 47  |                             |
| <i>IL22</i>    | caacaggctaagcacatgtca    | actgtgtccttcagcttttgc    | 6   |                             |
| <i>IL23A</i>   | cagcttcagctcctccact      | gactgaggcttggaaatctgc    | 14  |                             |
| <i>IL6</i>     | gatgagtacaaaagtcctgatcca | ctgcagccactggttctgt      | 40  |                             |
| <i>IL6</i>     | ccccagtacccccaggagaagat  | gctgagatgccgtcaggatgta   | w/o |                             |
| <i>IL8</i>     | agacagcagagcacacaagc     | aggaaggctccaagagag       | 72  |                             |
| <i>MMP1</i>    | acgaatttgccgacagagat     | gtccttggggatccgtgta      | 26  |                             |
| <i>MUC5AC</i>  | agcaccagtgcccaagtct      | actcctggcagtcctatgc      | 43  |                             |
| <i>PALLD</i>   | ttgaagggtccagttcaaca     | tcaggctggcagagatatga     | w/o | fibrosis                    |
| <i>PGK1</i>    | ctgtgggggtatttgaatgg     | cttcaggagctccaaactg      | w/o | reference gene              |
| <i>PPIA</i>    | ttcatctgcactgccaagac     | tcgagttgtccacagtcagc     | w/o | reference gene              |
| <i>RORC</i>    | cagcgtccaacatcttct       | ccacatctcccacatggact     | 69  |                             |
| <i>RXFP1</i>   | tggagtatgcttccctcttca    | tgcggccaaattaatacca      | 59  |                             |
| <i>SOCS1</i>   | cccctggtgtgtgtagcag      | gtaggagggtcgagttcagg     | 36  |                             |
| <i>SOCS3</i>   | gacttcgattcgggaccag      | aactgtctgtgggtgaccat     | 70  |                             |
| <i>SOD2</i>    | ctggacaaacctcagcccta     | tgatggcttcagcaactc       | 77  |                             |
| <i>TIPARP</i>  | ggaaattcttctgtagggacca   | gttggcttctcaatcaatcg     | 58  |                             |
| <i>TNF</i>     | cagccttctccttctctgat     | gccagagggtcgtattagaga    | 29  |                             |



**Supplementary Table S2.** Change in gene expression (mean, x-fold) compared to control after 24 h of exposure.  
*highlighted are values with p<0.0013 (Bonferroni correction)*

| Cell type |                                          | BEAS                                      |         |        |         |        |         |        |         |         |         | THP-1  |         |        |         |        |         |        |         |        |         | PBMC |  |
|-----------|------------------------------------------|-------------------------------------------|---------|--------|---------|--------|---------|--------|---------|---------|---------|--------|---------|--------|---------|--------|---------|--------|---------|--------|---------|------|--|
| Exposure  |                                          | Aqueous cigarette smoke extract (CSE) [%] |         |        |         |        |         |        |         |         |         |        |         |        |         |        |         |        |         |        |         |      |  |
|           |                                          | 2.2                                       |         | 2.5    |         | 2.9    |         | 3.3    |         | 4.0     |         | 2.2    |         | 2.9    |         | 4.0    |         | 5.0    |         | 4.0    |         |      |  |
| Gene      | Function                                 | x-fold                                    | p-value | x-fold | p-value | x-fold | p-value | x-fold | p-value | x-fold  | p-value | x-fold | p-value | x-fold | p-value | x-fold | p-value | x-fold | p-value | x-fold | p-value |      |  |
| RXFP1     | adhesion, relaxin receptor               | 1.0                                       | 0.9616  | 1.0    | 0.6854  | 1.2    | 0.8748  | 18.1   | 0.0494  | 83.1    | 0.0012  | -3.8   | 0.0345  | -21.7  | 0.0030  | -2.3   | 0.0082  | -1.9   | 0.0082  | n.d.   |         |      |  |
| CASP3     | apoptosis                                | 1.3                                       | 0.0020  | 1.4    | 0.0026  | 1.7    | 0.0021  | 2.0    | <0.001  | 1.9     | 0.0072  | 1.4    | 0.0387  | 1.6    | 0.0081  | 1.8    | 0.0237  | 1.1    | 0.4855  | 1.8    | 0.0138  |      |  |
| CASP4     | apoptosis                                | 1.0                                       | 0.8182  | 1.9    | 0.0389  | 3.5    | 0.0017  | 3.4    | 0.0152  | -1.2    | 0.7507  | 1.6    | 0.3637  | 3.6    | 0.0032  | -1.5   | 0.0809  | -1.7   | 0.0179  | -3.8   | 0.0011  |      |  |
| CASP5     | apoptosis                                | -1.7                                      | 0.2078  | -1.5   | 0.1899  | 4.0    | 0.0124  | 22.1   | 0.0063  | 49.3    | <0.001  | 2.4    | 0.0191  | 17.1   | 0.0043  | 41.0   | 0.0012  | 5.5    | 0.0220  | -1.7   | 0.0108  |      |  |
| CASP9     | apoptosis                                | 1.5                                       | <0.001  | 1.5    | 0.0140  | -1.2   | 0.0401  | -1.8   | 0.0010  | -2.4    | <0.001  | 1.4    | 0.0442  | 3.0    | 0.0082  | -1.8   | 0.0201  | -1.3   | 0.1159  | 1.3    | 0.0223  |      |  |
| FASLG     | apoptosis                                | 1.1                                       | 0.8468  | 12.6   | 0.0035  | 36.3   | <0.001  | 372.4  | <0.001  | 807.1   | <0.001  | 1.0    | 0.8091  | 1.0    | 0.7071  | 4.6    | <0.001  | 154.0  | <0.001  | -4.8   | 0.0010  |      |  |
| FOSL1     | apoptosis                                | 3.9                                       | <0.001  | 6.4    | <0.001  | 11.6   | <0.001  | 14.5   | <0.001  | 8.0     | <0.001  | 2.4    | 0.0290  | 10.6   | 0.0053  | 5.1    | 0.0141  | 3.4    | 0.0018  | 4.0    | <0.001  |      |  |
| TIPARP    | cellular stress, DNA damage              | 6.7                                       | <0.001  | 6.2    | <0.001  | 5.4    | <0.001  | 5.3    | <0.001  | 4.5     | <0.001  | 2.6    | 0.0045  | 8.2    | <0.001  | 5.9    | <0.001  | 4.6    | <0.001  | 1.9    | 0.0158  |      |  |
| HSPA1A    | cellular stress                          | 1.1                                       | 0.8068  | 3.0    | 0.0229  | 25.3   | <0.001  | 58.2   | <0.001  | 47.8    | <0.001  | 2.0    | 0.0016  | 17.2   | <0.001  | 144.4  | <0.001  | 38.6   | 0.0030  | 17.4   | <0.001  |      |  |
| HSPA2     | cellulare stress                         | -1.3                                      | 0.1095  | -1.0   | 0.8171  | 2.2    | 0.0049  | 6.4    | <0.001  | 11.6    | <0.001  | 1.4    | 0.0042  | 3.2    | 0.0038  | 16.4   | <0.001  | 13.5   | <0.001  | 15.5   | <0.001  |      |  |
| ABCB1     | drug metabolism                          | 1.0                                       | 0.3739  | 7.7    | 0.0674  | 61.6   | <0.001  | 1212.8 | <0.001  | 13809.1 | <0.001  | -1.4   | 0.4226  | 7.1    | 0.0226  | 64.6   | 0.0059  | 63.7   | 0.0061  | -2.5   | 0.0056  |      |  |
| CYP1A1    | drug metabolism, AhR-related             | 37.7                                      | <0.001  | 25.4   | <0.001  | 10.1   | <0.001  | 8.2    | <0.001  | 9.3     | <0.001  | 9.6    | 0.0071  | 44.7   | 0.0025  | 1.7    | 0.3108  | 1.6    | 0.2420  | -151.2 | <0.001  |      |  |
| IL17A     | IL17 family                              | -1.1                                      | 0.8896  | 1.3    | 0.4676  | 2.1    | 0.1510  | 3.0    | 0.0261  | 3.5     | 0.0141  | 1.5    | 0.2189  | 6.4    | 0.0622  | 10.2   | 0.0411  | 9.8    | 0.0081  | -1.4   | 0.6898  |      |  |
| IL17B     | IL17 family                              | 6.0                                       | 0.0440  | 4.4    | 0.0861  | 39.2   | <0.001  | 171.4  | 0.0054  | 1043.1  | <0.001  | 1.8    | 0.1487  | 1.1    | 0.8091  | 7.9    | <0.001  | 4.4    | 0.0181  | 4.2    | <0.001  |      |  |
| IL17C     | IL17 family                              | 1.4                                       | 0.2349  | 1.2    | 0.6855  | 2.3    | 0.1215  | 2.7    | 0.0043  | -1.1    | 0.8524  | 2.3    | 0.1856  | -1.2   | 0.8793  | 2.3    | 0.7950  | 1.7    | 0.5188  | -5.2   | 0.0011  |      |  |
| IL17D     | IL17 family                              | -1.1                                      | 0.7222  | -1.1   | 0.8848  | 1.2    | 0.3880  | 1.3    | 0.2243  | 1.1     | 0.7007  | -1.1   | 0.6610  | -2.7   | 0.3362  | 1.2    | 0.9775  | -1.1   | 0.9046  | 1.1    | 0.2050  |      |  |
| IL17E     | IL17 family                              | 1.1                                       | 0.9646  | -1.2   | 0.7165  | 1.1    | 0.4878  | 1.0    | 0.8253  | 0.9     | 0.6754  | -1.2   | 0.8371  | 1.0    | 0.6400  | 1.1    | 0.5378  | 1.1    | 0.4502  | 1.3    | 0.1959  |      |  |
| IL17F     | IL17 family                              | 8.1                                       | 0.0251  | 6.4    | 0.3416  | 42.2   | <0.001  | 272.8  | <0.001  | 769.4   | <0.001  | 5.4    | 0.7329  | 6.1    | 0.4226  | 288.2  | <0.001  | 301.3  | <0.001  | 198.5  | <0.001  |      |  |
| IL17RA    | IL17 receptor family                     | 2.0                                       | <0.001  | 2.1    | 0.0060  | 1.7    | 0.0117  | 1.0    | 0.7836  | -2.1    | 0.0334  | 1.5    | 0.1109  | -1.2   | 0.1947  | -1.8   | 0.0363  | -1.1   | 0.3037  | -3.5   | <0.001  |      |  |
| IL17RB    | IL17 receptor family                     | -1.5                                      | 0.1861  | -1.6   | 0.1837  | -1.5   | 0.5033  | 2.8    | 0.0519  | 10.7    | <0.001  | 2.2    | 0.1829  | 7.7    | 0.0261  | 43.7   | 0.0076  | 8.2    | 0.0261  | -2.2   | 0.0069  |      |  |
| IL17RC    | IL17 receptor family                     | 2.3                                       | <0.001  | 2.5    | 0.0011  | 1.7    | 0.0052  | -1.1   | 0.4969  | -2.1    | <0.001  | 3.1    | <0.001  | 2.9    | 0.0399  | -1.4   | 0.5778  | 1.0    | 0.8845  | 3.3    | 0.0015  |      |  |
| IL23A     | IL17-related                             | 1.3                                       | 0.2480  | 1.2    | 0.2652  | 1.7    | 0.0230  | 2.2    | 0.0098  | 4.4     | <0.001  | 1.2    | 0.0423  | -1.1   | 0.2979  | 1.4    | 0.2021  | 1.9    | 0.0503  | 1.2    | 0.2451  |      |  |
| RORC      | IL17-related                             | -3.1                                      | <0.001  | -9.8   | 0.0290  | -46.2  | 0.0013  | -16.9  | <0.001  | -22.0   | 0.0135  | -1.4   | 0.6345  | -1.0   | 0.8648  | -1.2   | 0.3748  | -1.4   | 0.5748  | 1.1    | 0.9073  |      |  |
| IL10      | inflammation                             | 1.0                                       | 0.8838  | 1.0    | 0.2283  | 1.0    | 0.1819  | 6.9    | 0.1589  | 85.5    | <0.001  | -1.8   | 0.0042  | -2.7   | 0.0078  | -3.9   | 0.0011  | -10.4  | <0.001  | -6.8   | <0.001  |      |  |
| IL18RAP   | inflammation                             | 1.1                                       | 0.8446  | -1.2   | 0.7546  | 15.7   | <0.001  | 159.0  | <0.001  | 674.8   | <0.001  | -1.2   | 0.3915  | -1.3   | 0.4615  | -1.2   | 0.8053  | -2.5   | 0.8233  | 1.3    | 0.2627  |      |  |
| IL22      | inflammation                             | 3.7                                       | 0.0037  | 4.2    | 0.1220  | 2.4    | 0.1931  | 16.1   | 0.0190  | 52.1    | <0.001  | 1.1    | 0.3314  | 1.0    | 0.8091  | 5.4    | 0.0098  | 61.0   | <0.001  | 22.7   | <0.001  |      |  |
| IL6       | inflammation                             | -1.2                                      | 0.1164  | -1.0   | 0.4350  | 1.9    | 0.0132  | 5.8    | <0.001  | 5.4     | <0.001  | 1.0    | 0.3911  | 2.7    | 0.0555  | 2.9    | 0.0286  | 1.0    | 0.8092  | -4.2   | <0.001  |      |  |
| IL8       | inflammation                             | -1.1                                      | 0.7886  | 2.3    | 0.0343  | 13.0   | 0.0018  | 77.4   | <0.001  | 53.4    | <0.001  | 5.6    | <0.001  | 33.6   | <0.001  | 6.1    | 0.0220  | 5.1    | 0.0018  | -1.5   | <0.001  |      |  |
| TNF       | inflammation                             | 1.1                                       | 0.7759  | 1.2    | 0.6354  | 5.0    | 0.0028  | 14.7   | 0.0059  | 217.8   | <0.001  | 4.0    | 0.0043  | 4.6    | 0.0019  | 2.7    | 0.0368  | 3.4    | 0.0196  | 1.6    | 0.0058  |      |  |
| DDIT3     | marker of ER stress                      | 3.8                                       | <0.001  | 5.8    | <0.001  | 11.2   | <0.001  | 12.9   | <0.001  | 16.9    | <0.001  | 3.7    | <0.001  | 7.6    | <0.001  | 4.7    | <0.001  | 5.4    | <0.001  | 5.9    | <0.001  |      |  |
| MUC5AC    | mucosa protection, IL17-related          | 1.4                                       | 0.1527  | -3.7   | 0.1697  | -6.0   | 0.0142  | 2.9    | 0.2775  | 15.9    | <0.001  | n.d.   |         |      |  |
| CDKN1C    | negative regulator of cell proliferation | -1.7                                      | 0.0082  | -1.8   | 0.0083  | 1.3    | 0.0897  | 3.9    | 0.0053  | 14.3    | <0.001  | 8.2    | 0.0025  | 22.1   | <0.001  | 54.5   | <0.001  | 51.4   | <0.001  | 7.4    | <0.001  |      |  |
| SOD2      | oxidative stress                         | 1.4                                       | <0.001  | 1.6    | <0.001  | 2.1    | <0.001  | 3.0    | <0.001  | 2.6     | <0.001  | 1.7    | 0.0454  | 2.8    | 0.0031  | 5.0    | <0.001  | 3.1    | 0.0030  | -2.3   | <0.001  |      |  |
| HMOX      | oxidative stress, NRF2-related           | 6.8                                       | <0.001  | 5.5    | <0.001  | 8.0    | <0.001  | 21.6   | <0.001  | 13.8    | <0.001  | 157.2  | <0.001  | 1855.4 | <0.001  | 424.2  | <0.001  | 32.7   | 0.0021  | 1.2    | 0.0533  |      |  |
| GPX1      | peroxidase                               | 1.2                                       | 0.0036  | 1.1    | 0.0520  | -1.1   | 0.0118  | 1.4    | 0.1027  | 3.1     | <0.001  | 1.1    | 0.3314  | -2.0   | 0.0212  | 1.6    | 0.0216  | 2.2    | 0.0111  | -2.6   | <0.001  |      |  |
| CDKN1A    | senescence                               | 1.4                                       | 0.0051  | 1.5    | 0.0116  | 2.6    | <0.001  | 4.6    | <0.001  | 4.5     | <0.001  | 3.1    | 0.0036  | 5.8    | <0.001  | 4.9    | <0.001  | 2.5    | <0.001  | 2.4    | <0.001  |      |  |
| SOCS1     | suppressor of cytokine signaling         | -1.2                                      | 0.0369  | -1.1   | 0.1766  | 2.3    | 0.0074  | 6.9    | <0.001  | 7.1     | <0.001  | 7.4    | 0.0011  | 25.2   | <0.001  | 35.0   | <0.001  | 27.2   | <0.001  | -1.4   | 0.0130  |      |  |
| SOCS3     | SOCS, IL-17-related                      | 1.2                                       | 0.3953  | 1.0    | 0.9446  | -1.9   | 0.2742  | 1.7    | 0.0969  | 1.9     | 0.0259  | 4.2    | 0.0074  | 2.3    | 0.6923  | 10.5   | 0.0261  | 3.9    | 0.0837  | 4.2    | <0.001  |      |  |
| MMP1      | tissue remodeling, collagenase           | 89.8                                      | <0.001  | 503.8  | <0.001  | 3727.9 | <0.001  | 9200.5 | <0.001  | 1077.4  | <0.001  | 9.5    | 0.0903  | 10.9   | 0.0532  | 12.2   | 0.0013  | 4.7    | <0.001  | -21.1  | <0.001  |      |  |

n.d.; not detectable

| Cell type      |                                          | BEAS         |         |              |         |              |         |               |         |              |         |               |         |                  |         |
|----------------|------------------------------------------|--------------|---------|--------------|---------|--------------|---------|---------------|---------|--------------|---------|---------------|---------|------------------|---------|
| Exposure       |                                          | Mercury [μM] |         |              |         |              |         |               |         | Cadmium [μM] |         |               |         | Brefeldin A [μM] |         |
|                |                                          | 0.29         |         | 0.58         |         | 1.2          |         | 2.3           |         | 19           |         | 38            |         | 17.8             |         |
| Gene           | Function                                 | x-fold       | p-value | x-fold       | p-value | x-fold       | p-value | x-fold        | p-value | x-fold       | p-value | x-fold        | p-value | x-fold           | p-value |
| <i>RXFP1</i>   | adhesion, relaxin receptor               | 1.0          | 0.3150  | 1.0          | 0.1128  | 9.9          | <0.001  | 42.4          | 0.0287  | 1.0          | 0.6410  | <b>118.2</b>  | <0.001  | 1.1              | 0.8856  |
| <i>CASP3</i>   | apoptosis                                | -1.3         | 0.0076  | -1.3         | 0.0399  | -1.1         | 0.4378  | -1.3          | 0.0190  | <b>-1.5</b>  | <0.001  | <b>-5.8</b>   | <0.001  | 2.5              | 0.0044  |
| <i>CASP4</i>   | apoptosis                                | -1.0         | 0.9863  | 4.3          | 0.0374  | 1.8          | 0.4033  | 2.1           | 0.3617  | -5.7         | 0.0254  | 1.2           | 0.7278  | -1.1             | 0.9654  |
| <i>CASP5</i>   | apoptosis                                | 1.1          | 0.8088  | 1.8          | 0.1504  | 8.1          | 0.0093  | <b>33.5</b>   | <0.001  | 1.3          | 0.5748  | <b>40.7</b>   | <0.001  | 1.1              | 0.8946  |
| <i>CASP9</i>   | apoptosis                                | <b>-1.4</b>  | <0.001  | <b>-2.4</b>  | <0.001  | <b>-3.1</b>  | <0.001  | <b>-3.7</b>   | <0.001  | <b>-1.6</b>  | <0.001  | <b>-2.0</b>   | <0.001  | 2.0              | 0.0028  |
| <i>FASLG</i>   | apoptosis                                | 1.0          | 0.3092  | 3.2          | 0.0101  | <b>8.2</b>   | <0.001  | <b>50.7</b>   | <0.001  | 1.0          | 0.6521  | <b>17.1</b>   | <0.001  | -1.1             | 0.9854  |
| <i>FOSL1</i>   | apoptosis                                | 1.8          | 0.0011  | <b>4.2</b>   | <0.001  | <b>7.6</b>   | <0.001  | <b>5.4</b>    | <0.001  | 3.0          | <0.001  | <b>15.0</b>   | <0.001  | 3.2              | 0.0598  |
| <i>TIPARP</i>  | cellular stress, DNA damage              | -1.0         | 0.9820  | 1.4          | 0.0142  | <b>2.5</b>   | <0.001  | <b>3.3</b>    | <0.001  | 1.2          | 0.2252  | <b>3.2</b>    | <0.001  | 2.4              | 0.2065  |
| <i>HSPA1A</i>  | cellulare stress                         | -1.4         | 0.0076  | <b>19.9</b>  | <0.001  | <b>44.4</b>  | <0.001  | <b>101.0</b>  | <0.001  | <b>4.4</b>   | <0.001  | <b>134.3</b>  | <0.001  | -2.7             | 0.0506  |
| <i>HSPA2</i>   | cellulare stress                         | -1.7         | <0.001  | 1.4          | 0.0385  | <b>3.4</b>   | <0.001  | <b>10.5</b>   | <0.001  | -1.2         | 0.0370  | <b>1.6</b>    | <0.001  | -3.5             | 0.0483  |
| <i>ABCB1</i>   | drug metabolism                          | -1.0         | 0.1778  | <b>8.5</b>   | <0.001  | <b>37.2</b>  | <0.001  | <b>619.9</b>  | <0.001  | 3.1          | 0.0417  | <b>1791.1</b> | <0.001  | 1.0              | 0.8654  |
| <i>CYP1A1</i>  | drug metabolism, AhR-related             | -1.4         | 0.2777  | -1.3         | 0.3150  | 1.2          | 0.3502  | 1.7           | 0.1747  | 1.2          | 0.6300  | <b>5.2</b>    | <0.001  | 1.6              | 0.3100  |
| <i>IL17A</i>   | IL17 family                              | 1.1          | 0.3042  | 3.1          | 0.0897  | <b>1.6</b>   | <0.001  | 6.2           | 0.0039  | -1.6         | 0.0211  | <b>4.2</b>    | <0.001  | -2.2             | 0.4599  |
| <i>IL17B</i>   | IL17 family                              | -4.1         | 0.2307  | 1.2          | 0.5829  | 6.5          | 0.0087  | <b>80.8</b>   | <0.001  | 1.3          | 0.5405  | <b>103.5</b>  | <0.001  | 6.1              | 0.0748  |
| <i>IL17C</i>   | IL17 family                              | -2.5         | 0.1471  | 1.3          | 0.6835  | -2.2         | 0.2333  | -1.1          | 0.8580  | -1.3         | 0.6571  | -1.6          | 1.0000  | -2.5             | 0.3264  |
| <i>IL17D</i>   | IL17 family                              | -2.1         | 0.0030  | <b>-4.3</b>  | <0.001  | -2.5         | 0.0039  | -1.7          | 0.0352  | -1.5         | 0.0957  | -1.2          | 0.3854  | 4.9              | 0.0107  |
| <i>IL17E</i>   | IL17 family                              | -1.3         | 0.3483  | -1.1         | 0.2844  | 1.5          | 0.5317  | 1.1           | 0.6270  | 1.2          | 0.4423  | -1.1          | 0.2979  | 1.1              | 0.8246  |
| <i>IL17F</i>   | IL17 family                              | 2.3          | 0.2817  | 2.4          | 0.1188  | 4.0          | 0.1040  | <b>38.5</b>   | <0.001  | 1.0          | 1.0000  | <b>32.0</b>   | <0.001  | 14.9             | 0.0124  |
| <i>IL17RA</i>  | IL17 receptor family                     | 1.1          | 0.3091  | -1.0         | 0.9317  | -1.5         | 0.0245  | <b>-2.3</b>   | <0.001  | -1.3         | 0.0927  | -1.7          | 0.0069  | 2.3              | 0.0078  |
| <i>IL17RB</i>  | IL17 receptor family                     | -2.3         | 0.0071  | -2.5         | 0.0051  | 1.3          | 0.5581  | <b>6.7</b>    | <0.001  | -1.6         | 0.1211  | -1.3          | 0.3476  | <b>3.6</b>       | <0.001  |
| <i>IL17RC</i>  | IL17 receptor family                     | 1.2          | 0.0261  | -1.3         | 0.0037  | -1.9         | 0.0011  | <b>-4.9</b>   | <0.001  | -1.2         | 0.0433  | <b>-2.1</b>   | <0.001  | 3.7              | 0.0036  |
| <i>IL23A</i>   | IL17-related                             | -1.1         | 0.5298  | 1.6          | 0.3032  | 1.1          | 0.6200  | <b>5.0</b>    | <0.001  | 1.2          | 0.1997  | <b>10.7</b>   | <0.001  | 1.1              | 0.8846  |
| <i>RORC</i>    | IL17-related                             | -3.7         | 0.4175  | -6.7         | 0.6251  | -5.4         | 0.3725  | -15.9         | 0.2740  | -3.3         | 0.0626  | -10.5         | 0.1460  | -1.1             | 0.3858  |
| <i>IL10</i>    | inflammation                             | 1.0          | 0.9317  | 1.0          | 0.5581  | 2.2          | 0.0328  | <b>25.6</b>   | <0.001  | 1.0          | 0.2258  | <b>139.7</b>  | <0.001  | 1.0              | 0.6200  |
| <i>IL18RAP</i> | inflammation                             | 1.0          | 1.0000  | 1.8          | 0.0047  | <b>20.1</b>  | <0.001  | <b>343.9</b>  | <0.001  | <b>21.0</b>  | <0.001  | <b>2290.8</b> | <0.001  | 1.0              | 1.0000  |
| <i>IL22</i>    | inflammation                             | 1.0          | 0.3715  | -1.9         | 0.3896  | 2.6          | 0.1299  | 3.6           | 0.0202  | 1.0          | 0.8977  | 15.2          | 0.0017  | 1.0              | 1.0000  |
| <i>IL6</i>     | inflammation                             | -1.3         | 0.3433  | -1.4         | 0.2444  | 1.5          | 0.1935  | <b>7.9</b>    | <0.001  | 1.7          | 0.1075  | <b>8.8</b>    | <0.001  | 5.0              | 0.0631  |
| <i>IL8</i>     | inflammation                             | 2.0          | <0.001  | <b>6.4</b>   | <0.001  | <b>14.2</b>  | <0.001  | <b>53.7</b>   | <0.001  | <b>4.3</b>   | <0.001  | <b>133.6</b>  | <0.001  | -1.8             | 0.5608  |
| <i>TNF</i>     | inflammation                             | -1.4         | 0.2795  | -1.1         | 0.7895  | 2.5          | 0.0274  | <b>13.1</b>   | <0.001  | -1.0         | 0.9472  | <b>58.5</b>   | <0.001  | -1.7             | 0.4784  |
| <i>DDIT3</i>   | marker of ER stress                      | 1.1          | 0.2167  | <b>3.4</b>   | <0.001  | <b>7.1</b>   | <0.001  | <b>12.1</b>   | <0.001  | <b>1.8</b>   | <0.001  | <b>17.5</b>   | <0.001  | <b>40.5</b>      | <0.001  |
| <i>MUC5AC</i>  | mucosa protection, IL17-related          | -6.6         | 0.1016  | -1.5         | 0.3155  | <b>5.0</b>   | <0.001  | <b>45.1</b>   | <0.001  | 2.8          | 0.0033  | <b>260.8</b>  | <0.001  | -5.2             | 0.4668  |
| <i>CDKN1C</i>  | negative regulator of cell proliferation | -2.7         | <0.001  | 2.0          | 0.0013  | <b>8.0</b>   | <0.001  | <b>20.8</b>   | <0.001  | <b>2.7</b>   | <0.001  | <b>189.3</b>  | <0.001  | -1.5             | 0.5387  |
| <i>SOD2</i>    | oxidative stress                         | -1.3         | 0.0554  | 1.2          | 0.1209  | <b>2.0</b>   | <0.001  | <b>3.1</b>    | <0.001  | -1.0         | 0.8987  | -1.4          | 0.0033  | -1.0             | 0.9972  |
| <i>HMOX</i>    | oxidative stress, NRF2-related           | <b>6.5</b>   | <0.001  | <b>29.2</b>  | <0.001  | <b>44.0</b>  | <0.001  | <b>56.6</b>   | <0.001  | <b>29.2</b>  | <0.001  | <b>244.2</b>  | <0.001  | 3.4              | 0.0019  |
| <i>GPX1</i>    | peroxidase                               | <b>-3.6</b>  | <0.001  | <b>-7.0</b>  | <0.001  | <b>-7.0</b>  | <0.001  | <b>-4.1</b>   | <0.001  | <b>-3.4</b>  | <0.001  | <b>-1.8</b>   | <0.001  | -1.4             | 0.5633  |
| <i>CDKN1A</i>  | senescence                               | <b>-1.5</b>  | <0.001  | <b>1.4</b>   | <0.001  | <b>3.9</b>   | <0.001  | <b>6.0</b>    | <0.001  | <b>-1.7</b>  | <0.001  | <b>1.8</b>    | <0.001  | 3.1              | 0.0161  |
| <i>SOCS1</i>   | suppressor of cytokine signaling         | <b>-2.8</b>  | <0.001  | -1.1         | 0.7065  | <b>2.0</b>   | <0.001  | <b>5.9</b>    | <0.001  | -1.1         | 0.0252  | <b>10.3</b>   | <0.001  | -3.5             | 0.1888  |
| <i>SOCS3</i>   | SOCS, IL-17-related                      | -2.0         | 0.0128  | -5.1         | 0.0348  | -2.3         | 0.0067  | -1.5          | 0.2750  | -1.7         | 0.0446  | -1.2          | 0.5075  | -1.5             | 0.7428  |
| <i>MMP1</i>    | tissue remodeling, collagenase           | <b>10.4</b>  | <0.001  | <b>170.7</b> | <0.001  | <b>814.2</b> | <0.001  | <b>1834.1</b> | <0.001  | <b>53.5</b>  | <0.001  | <b>494.3</b>  | <0.001  | 6.2              | 0.0288  |

n.d.; not detectable
